# Supplementary material
Source: publisher figshare collection journal article supplement (https://frontiersin.figshare.com/ndownloader/files/13392842)
Supplement: Supplementary file [file 13392842]

### Supplementary table S1

| VPD in the growth chamber (kPa) | Range of VPD in Li-cor (kPa) | Average VPD in Li-cor (kPa) |
|---------------------------------|------------------------------|-----------------------------|
| 0.83±0.01                       | 0.78 to 0.82                 | 0.80±0.014                  |
| 1.33±0.01                       | 1.22 to 1.42                 | 1.34±0.074                  |
| 1.66±0.02                       | 1.53 to 1.66                 | 1.60±0.044                  |
| 1.87±0.01                       | 1.87 to 1.91                 | 1.89±0.016                  |
| 2.65±0.01                       | 2.54 to 2.69                 | 2.63±0.056                  |
| 3.26±0.02                       | 3.30 to 3.42                 | 3.38±0.023                  |

**Supplementary table S1: Vapor pressure deficit (VPD)±S.E. maintained in the growth chamber experiment 1. Range of VPD obtained in Li-cor during gas exchange measurements for the three replicates in each chamber and the average VPD±S.E..**
